# Supplementary material
Source: Springer Nature journal article supplement (https://www.springermedizin.de/resource/supplementary/12947_2008_231_MOESM2_ESM.pdf/9556504)
Supplement: MOESM2 [file 9556504]

**Table 3. Minimum dataset and additional data comprising the standard adult TEE study.** *Table describes the minimum dataset and additional data comprising the standard adult TEE study by view, modality, structure, measurements, and derived calculations. Additional data are annotated with [A]. Views and measurements not supported unanimously are given in italics.* CFM = color flow mapping; PW = pulsed wave Doppler; CW = continuous wave Doppler; LV = left ventricle; RV = right ventricle; RWMA = regional wall motion abnormalities; LA = left atrium; RA = right atrium; Las = LA in systole; LVIDd/s left ventricular internal diameter in diastole and systole; LVSD/s left ventricular septal width in diastole and systole; LVPWd/s left ventricular posterior wall width in diastole and systole; ESA = end systolic area; EDA = end diastolic area; FAC = fractional area change; FS = fractional shortening; MV = mitral valve; MR = mitral regurgitation; MS = mitral stenosis; LVOT = left ventricular outflow tract; AR = aortic regurgitation; AS = aortic stenosis; VSD = ventricular septal defect; IVC = inferior vena cava; SVC = superior vena cava; TV = tricuspid valve; TR = tricuspid regurgitation; Vmax, V mean = maximum and mean velocities; VTI = velocity-time integral; Pmax, P mean = maximum and mean pressure gradient; RVOT = right ventricular outflow tract; PV = pulmonary valve; PR = pulmonary regurgitation; PS = pulmonary stenosis; PA = pulmonary artery; PAPs,d = pulmonary artery pressure, systolic/diastolic; AV = aortic valve; LUPV = left upper pulmonary vein; PDA = pervium doctus arteriosum; PHT pressure half-time; DET deceleration time; IVRT = isovolumic relaxation time; RVd right ventricular cavity diameter in diastole; MVA = mitral valve area; IVS = inter-ventricular septum; IAS = interatrial septum; SAX = short axis; Ch = chamber; Sub-AS = subaortic stenosis; CO = cardiac output; SV = stroke volume.

| <b>View</b>                       | <b>Modality</b> | <b>Structures Assessed</b>                                                                 | <b>Measure</b>                           | <b>Calculate</b>               |
|-----------------------------------|-----------------|--------------------------------------------------------------------------------------------|------------------------------------------|--------------------------------|
| <b>TG-SAX<br/>(mid-papillary)</b> | 2D              | LV cavity size, wall thickness, function, RWMA<br>RV cavity size, wall thickness, function | LV EDA, LV ESA                           | FAC                            |
|                                   | M mode          | LV cavity size<br>IVC, Hepatic Veins                                                       | LVIDd/s, LVSD/s<br>Respiratory variation | FS<br>IVC distensibility index |

|                       |     |                                                                   |                                  |                                        |
|-----------------------|-----|-------------------------------------------------------------------|----------------------------------|----------------------------------------|
| <b>TG-SAX (basal)</b> | 2D  | MV - appearance<br>TV - appearance<br>LV: function, RWMA          |                                  |                                        |
|                       | CFM | MR/TR                                                             |                                  |                                        |
| <b>TG-LVOT</b>        | 2D  | LVOT, AV<br>MV sub-valvar apparatus                               |                                  |                                        |
|                       | CFM | AR                                                                |                                  |                                        |
|                       | PW  | LVOT, AV                                                          | VTI [A]                          | SV, CO, Vmax<br>respiratory variations |
|                       | CW  | LVOT, AV                                                          | Vmax, Vmean, VTI                 | Pmax, Pmean                            |
| <b>TG-RVOT</b>        | 2D  | TV appearance – valve & subvalvar<br>RVOT<br>PV                   | RVOT dimension<br>PV annulus [A] |                                        |
|                       | CFM | TR, PR, RVOT                                                      |                                  |                                        |
|                       | PW  | RVOT/PV [A]<br>PR [A]                                             | Vmax<br>Vmax, Pmean              | PAPs                                   |
|                       | CW  | RVOTO/PV [A]                                                      | Vmax PRed                        | Vmean Pmax                             |
| <b>Deep TG</b>        | 2D  | LV size, function<br>RV size, function<br>MV sub-valvar apparatus |                                  |                                        |
|                       | PW  | LVOT, AV                                                          | VTI, Vmax [A]                    | SV, CO, Vmax resp<br>variations        |
|                       | CW  | LVOT, AV<br>AR                                                    | Vmax, Vmean, VTI                 | Pmax, Pmean                            |

|                            |     |                                                                                                                      |                                                                                  |                                                              |
|----------------------------|-----|----------------------------------------------------------------------------------------------------------------------|----------------------------------------------------------------------------------|--------------------------------------------------------------|
| <b>ME- 4Ch</b>             | 2D  | LV cavity size, wall thickness, function<br>(IVS, lateral wall)<br>RV cavity size and function<br>LA size<br>RA size | Area or volume [A]<br>Area or volume [A]                                         | LA vol index[A]<br>RA vol index[A]                           |
|                            |     | MV – appearance and function<br>TV – appearance and function                                                         |                                                                                  |                                                              |
|                            | CFM | MV inflow, MR<br>TV inflow, TR                                                                                       | Vena contracta, PISA                                                             | Severity MR                                                  |
|                            | PW  | LV inflow (MV tips)<br>RV inflow (TV tips)<br>LUPV drainage                                                          | E, A DET<br>E, A<br>S, D, A, S VTI, D VTI,                                       | E/A ratio<br>IVRT [A]<br>S/D ratio, Syst Fraction            |
|                            | CW  | MS<br>MR<br>TS<br>TR                                                                                                 | Vmax, Vmean [A]<br>LV:LA pressure drop<br>Vmax, Vmean [A]<br>RV:RA pressure drop | Pmax, Pmean<br>PHT [A] MVA<br>Pmax, Pmean<br>Pmax,, est PAPs |
| <b>ME-<br/>commissural</b> | 2D  | LV function [A]<br>LA dimension<br>MV appearance, function, annular size                                             | LA size                                                                          |                                                              |
|                            | CFM | MR                                                                                                                   |                                                                                  |                                                              |
| <b>ME-2Ch</b>              | 2D  | LV function (anterior, inferior wall)<br>LAA<br>MV appearance, function                                              |                                                                                  |                                                              |
| <b>ME-LAX</b>              | 2D  | LV function (antero-septum, posterior wall)<br>LVOT, AV – appearance and function<br>MV appearance, function         | LVOT, annulus, Asc Aorta                                                         |                                                              |
|                            | CFM | MR                                                                                                                   | Vmax                                                                             | Pmax,                                                        |

|                               |               |                                           |                                                            |                                           |
|-------------------------------|---------------|-------------------------------------------|------------------------------------------------------------|-------------------------------------------|
|                               |               | AS/AR<br>Sub-AS                           | AR width<br>Vmax , VTI                                     | AR:LVOT [A]                               |
|                               | PW            | LV inflow (MV tips)                       | E, A, E DET                                                | E/A ratio                                 |
| <b>RV inflow-<br/>outflow</b> | 2D            | TV, RV, PV                                |                                                            |                                           |
|                               | CFM           | TR, PR./PS, RVOT obstruction              |                                                            |                                           |
|                               | PW            | RV inflow                                 | E, A                                                       |                                           |
|                               | CW            | TR                                        | RV:RA pressure drop                                        | Pmax,, est PAPs                           |
| <b>AV-SAX</b>                 | 2D            | AV structure<br>Coronary ostia<br>IAS, PV |                                                            |                                           |
|                               | CFM           | AR<br>Coronary flow<br>PR/PS              |                                                            |                                           |
|                               | PW            | Coronary flow                             | Vmax                                                       |                                           |
| <b>Bicaval</b>                | 2D            | SVC, IVC, IAS, RAA                        |                                                            |                                           |
|                               | M-Mode<br>CFM | SVC<br>IAS                                | Respiratory variations<br>Direction of shunting if PFO/ASD | SVC collapsibility. index<br>Indirect LAP |
|                               | PW            | RV inflow                                 | E, A                                                       |                                           |
|                               | CW            | TR                                        | RV:RA pressuredrop                                         | Pmax,, est PAPs                           |
| <b>UE PA</b>                  | 2D            | Main PA, RPA, LPA<br>Ascending Aorta      | PA Diameter, Aorta diameter                                |                                           |
|                               | PW            | PA Doppler                                | VTI                                                        | CO, SV                                    |
